# Supplementary material for: Environmental Sustainability Assessment of Pig Farms in Selected European Countries: Combining LCA and Key Performance Indicators for Biodiversity Assessment
Source: MDPI journal article supplement (doi:10.3390/su132011230), 2021-10-12
Supplement: s1 [file s1]

# Environmental Sustainability Assessment of Pig Farms in Selected European Countries: Combining LCA and Key Performance Indicators for Biodiversity Assessment

Antonia Katharina Ruckli <sup>1,\*</sup>, Sabine Dippel <sup>2</sup>, Nora Durec <sup>1</sup>, Monika Gebska <sup>3</sup>, Jonathan Guy <sup>4</sup>,  
Juliane Helmerichs <sup>2</sup>, Christine Leeb <sup>1</sup>, Herman Vermeer <sup>5</sup> and Stefan Hörtenhuber <sup>1,6,\*</sup>

- <sup>1</sup> Division of Livestock Sciences, Department of Sustainable Agricultural Systems, University of Natural Resources and Life Sciences, Gregor-Mendel-Str. 33, 1180 Vienna, Austria; noradurec@gmx.at (N.D.), christine.leeb@boku.ac.at (C.L.)
- <sup>2</sup> Friedrich-Loeffler-Institut, Institute of Animal Welfare and Animal Husbandry, Dörnbergstr. 25/27, 29223 Celle, Germany; sabine.dippel@fli.de (S.D.), helmerichs.ju@gmail.com (J.H.)
- <sup>3</sup> Institute of Management, Warsaw University of Life Sciences, Nowoursynowska 166, 02-787 Warszawa, Poland; monika\_gebska@sggw.edu.pl
- <sup>4</sup> Food and Rural Development, School of Agriculture, Newcastle University, Kings Road, NE1 7RU Newcastle upon Tyne, UK; jonathan.guy@newcastle.ac.uk
- <sup>5</sup> Wageningen University & Research, De Elst 1, P.O. Box 338, 6700AH Wageningen, The Netherlands; herman.vermeer@wur.nl
- <sup>6</sup> FiBL Deutschland e.V., Kasseler Str. 1a, PF 90 01 63, 60486 Frankfurt am Main, Germany
- \* Correspondence: antonia.ruckli@boku.ac.at (A.K.R.); SH stefan.hoertenhuber@boku.ac.at (S.H)

**Supplementary Material Table S1.** Abbreviations.

|                                       | Abbreviation        |
|---------------------------------------|---------------------|
| carbon dioxide equivalents            | CO <sub>2</sub> -eq |
| sulphur dioxide equivalents           | SO <sub>2</sub> -eq |
| phosphor equivalents                  | P-eq                |
| nitrogen equivalents                  | N-eq                |
| Life Cycle Assessment                 | LCA                 |
| Key Performance Indicator             | KPI                 |
| breeding unit                         | BU                  |
| finishing unit                        | FU                  |
| fossil energy depletion               | FED                 |
| global warming potential              | GWP                 |
| acidification potential               | AP                  |
| fresh water eutrophication potential  | FEP                 |
| marine water eutrophication potential | MEP                 |
| Genetic diversity                     | GD                  |
| Speciec diversity                     | SD                  |
| Ecosystem diversity                   | ED                  |
| megajoule                             | MJ                  |
| body mass net sold                    | BMNS                |

**Supplementary Material Table S2.** Farm-specific primary (foreground) data used for LCA calculations.

| Category                           | Farm-Specific Data                                                                                                                                                                                                                                                                                                                                                                                                                                                                                                                                                                                       |
|------------------------------------|----------------------------------------------------------------------------------------------------------------------------------------------------------------------------------------------------------------------------------------------------------------------------------------------------------------------------------------------------------------------------------------------------------------------------------------------------------------------------------------------------------------------------------------------------------------------------------------------------------|
| Farm size and productivity numbers | Average number of sows (n)<br>Average number of places for weaners/finishers (n)<br>Number of litters per sow and year (n)<br>Number of piglets born per sow and year or per litter (n)<br>Number of piglets weaned per sow and year or per litter (n)<br>Replacement rate of sows (%)<br>Mortality rate of sows, suckling piglets, weaners and finishers (%)                                                                                                                                                                                                                                            |
| Bought-in pigs                     | Number and weight of weaners, gilts/sows, as appropriate (n)                                                                                                                                                                                                                                                                                                                                                                                                                                                                                                                                             |
| Sold pigs                          | Number and weight of weaners, finishers, gilts and sows, as appropriate (n)                                                                                                                                                                                                                                                                                                                                                                                                                                                                                                                              |
| Feed management                    | Composition of feed (% of each feed component in feed)<br>Amount of feed used per pig and day ( $\text{kg d}^{-1}$ )<br>Number of days in each production phase (d)<br>Feed conversion ratio of weaners and finishers (if available, otherwise calculated; $\text{kg feed} \times \text{kg live weight}^{-1}$ )<br>Average daily gain of weaners and finishers (if available, otherwise calculated; $\text{g d}^{-1}$ )<br>Area and yield of home-grown feed components (area, $\text{kg ha}^{-1}$ )<br>For home-grown feed: amount of nitrogen and phosphate fertilisers per ha ( $\text{kg ha}^{-1}$ ) |
| Manure management                  | Proportion of slurry/farmyard manure (%)<br>Proportion of pigs that have access to pasture (%)<br>Proportion of slurry covered and type of cover (roof, foil, tent, natural crust and concrete cover) (%)<br>Proportion of farmyard manure composted (%)<br>Proportion of manure dispatched or digested in a biogas plant outside the farm (%)                                                                                                                                                                                                                                                           |
| Bedding material                   | Amount of straw per sow and year and per weaner/finisher place ( $\text{kg sow}^{-1}/\text{kg place}^{-1}$ )                                                                                                                                                                                                                                                                                                                                                                                                                                                                                             |
| Electric energy                    | Total amount of kilowatt hours used ( $\text{kWh y}^{-1}$ )<br>Percentages used in breeding and finishing unit (for breeding-to-finishing farms; %)                                                                                                                                                                                                                                                                                                                                                                                                                                                      |

**Supplementary Material Table S3.** Composition of compound feed.

|                                                                      | Ingredients (%) |                   |                   |               |                     |       |        |                   |            |      |
|----------------------------------------------------------------------|-----------------|-------------------|-------------------|---------------|---------------------|-------|--------|-------------------|------------|------|
|                                                                      | Corn            | Soybean meal (48) | Soybean meal (44) | Rapeseed meal | Sunflower seed meal | Wheat | Barley | Regional Soy cake | Fava beans | Peas |
| Piglet feed CONVENTIONAL                                             | 60              | 9                 | 1                 | 10            | 10                  | 10    |        |                   |            |      |
| Piglet feed REGIONAL with European soybean meal                      | 60              | 9                 | 1                 | 10            | 10                  | 10    |        |                   |            |      |
| Piglet feed ORGANIC                                                  | 15              |                   |                   |               |                     | 28    | 22     | 15                |            | 20   |
| Growing pig / lactating sow feed CONVENTIONAL                        | 50              | 7                 | 3                 | 10            | 9                   | 9     | 12     |                   |            |      |
| Growing pig / lactating sow feed REGIONAL with European soybean meal | 50              | 5                 |                   | 10            | 10                  | 10    | 15     |                   |            |      |
| Growing pig / lactating sow feed ORGANIC                             | 15              |                   |                   |               |                     | 28    | 26     | 15                |            | 16   |
| Finishing feed CONVENTIONAL                                          | 50              | 3                 | 5                 | 10            | 9                   | 10    | 13     |                   |            |      |
| Finishing feed REGIONAL with European soybean meal                   | 50              | 2                 | 5                 | 10            | 9                   | 10    | 14     |                   |            |      |
| Finishing feed ORGANIC                                               | 15              |                   |                   |               |                     | 35    | 30     | 10                |            | 10   |
| Gestating/empty sow feed CONVENTIONAL                                |                 |                   |                   | 5             | 5                   | 20    | 70     |                   |            |      |
| Gestating/empty sow feed REGIONAL                                    |                 |                   |                   | 5             | 5                   | 20    | 70     |                   |            |      |
| Gestating/empty sow feed ORGANIC                                     |                 |                   |                   |               |                     | 30    | 50     | 1                 |            | 19   |
| Protein mix CONVENTIONAL (30% CP, 12.5 MJ ME)                        | 30              | 50                | 10                | 5             | 5                   |       |        |                   |            |      |
| Protein mix REGIONAL (30% CP, 12.5 MJ ME) with European soybean meal | 30              | 50                | 10                | 5             | 5                   |       |        |                   |            |      |
| Protein mix ORGANIC (30% CP, 12.5 MJ ME)                             |                 |                   |                   |               |                     |       | 30     | 50                | 20         |      |

CP = crude protein, MJ ME = megajoule metabolisable energy.

**Supplementary Material Table S4.** Impact factors of bought-in feed components.

| Unit per kg BMNS                                         |                                                                 | FED<br>MJ | GWP<br>CO <sub>2</sub> -eq. | AP<br>SO <sub>2</sub> -eq. | FEP<br>P-eq.            | MEP<br>N-eq.            |
|----------------------------------------------------------|-----------------------------------------------------------------|-----------|-----------------------------|----------------------------|-------------------------|-------------------------|
| <b>Bought-in feed components 1 (conventional)</b>        |                                                                 |           | <b>*10<sup>-1</sup></b>     | <b>*10<sup>-3</sup></b>    | <b>*10<sup>-5</sup></b> | <b>*10<sup>-4</sup></b> |
| barley                                                   | Ecoinvent                                                       | 4.5       | 5.2                         | 4.8                        | 12.4                    | 95.2                    |
| maize (CCM)                                              | Ecoinvent                                                       | 2.9       | 3.5                         | 3.7                        | 13.9                    | 26.4                    |
| maize (corn)                                             | Ecoinvent                                                       | 5.0       | 5.5                         | 5.3                        | 21.7                    | 37.9                    |
| horse/faba been                                          | Ecoinvent                                                       | 2.1       | 3.9                         | 1.4                        | 14.9                    | 98.5                    |
| lucerne (alfalfa) and forage (incl. grassland) AS SILAGE | Ecoinvent                                                       | 1.5       | 3.2                         | 3.1                        | 8.4                     | 135.9                   |
| pseudo cereals, e.g. sorghum                             | Ecoinvent                                                       | 4.5       | 5.2                         | 4.8                        | 12.4                    | 95.2                    |
| oats                                                     | Ecoinvent                                                       | 4.6       | 7.0                         | 11.1                       | 56.8                    | 450.4                   |
| protein peas                                             | Ecoinvent                                                       | 2.1       | 3.5                         | 2.6                        | 15.9                    | 83.2                    |
| rye                                                      | Ecoinvent                                                       | 5.2       | 6.4                         | 5.0                        | 19.3                    | 154.7                   |
| soybean                                                  | Ecoinvent                                                       | 14.5      | 37.2                        | 3.0                        | 22.6                    | 83.0                    |
| triticale                                                | Ecoinvent                                                       | 5.7       | 8.9                         | 10.1                       | 32.1                    | 139.7                   |
| wheat                                                    | Ecoinvent                                                       | 5.5       | 7.0                         | 7.6                        | 54.2                    | 76.7                    |
| other feed                                               | [average of Ecoinvent data sets]                                | 4.8       | 8.0                         | 5.2                        | 23.7                    | 123.1                   |
| <b>Bought-in feed components 1 (organic)</b>             |                                                                 |           | <b>*10<sup>-1</sup></b>     | <b>*10<sup>-3</sup></b>    | <b>*10<sup>-5</sup></b> | <b>*10<sup>-4</sup></b> |
| Organic barley                                           | Ecoinvent                                                       | 2.3       | 2.9                         | 11.6                       | 13.9                    | 182.1                   |
| Organic maize/corn                                       | Ecoinvent                                                       | 1.0       | 2.8                         | 10.3                       | 9.0                     | 104.2                   |
| Organic wheat                                            | Ecoinvent                                                       | 2.5       | 3.4                         | 14.8                       | 14.7                    | 214.0                   |
| Organic protein peas                                     | Ecoinvent                                                       | 2.8       | 5.5                         | 13.2                       | 18.3                    | 150.6                   |
| Organic faba beans                                       | Ecoinvent                                                       | 2.0       | 5.4                         | 11.4                       | 15.0                    | 157.5                   |
| <b>Bought-in feed components 2 (conventional)</b>        |                                                                 |           | <b>*10<sup>-1</sup></b>     | <b>*10<sup>-3</sup></b>    | <b>*10<sup>-5</sup></b> | <b>*10<sup>-4</sup></b> |
| HP soybean meal (extracted)                              | Ecoinvent                                                       | 11.2      | 24.5                        | 3.1                        | 18.5                    | 61.7                    |
| soy cake Europe                                          | Agribalyse                                                      | 2.2       | 1.8                         | 1.6                        | 52.3                    | 75.6                    |
| soybeans (toasted) Europe                                | Agribalyse                                                      | 2.1       | 2.6                         | 2.4                        | 50.0                    | 94.9                    |
| rapeseed meal (extracted)                                | Ecoinvent                                                       | 3.8       | 4.4                         | 7.1                        | 11.8                    | 64.4                    |
| sunflower meal (extracted)                               | Ecoinvent                                                       | 2.3       | 3.3                         | 2.8                        | 7.2                     | 81.3                    |
| distillers dry grains with solubles                      | Agribalyse                                                      | 3.1       | 3.4                         | 5.4                        | 10.5                    | 39.7                    |
| fish meal                                                | Agri-footprint                                                  | 10.4      | 8.2                         | 4.5                        | 0.2                     | 22.0                    |
| yeast                                                    | Ecoinvent                                                       | 9.6       | 15.1                        | 7.6                        | 22.7                    | 66.4                    |
| potatoe protein                                          | Agribalyse                                                      | 8.5       | 9.9                         | 16.0                       | 26.6                    | 144.7                   |
| whey                                                     | Ecoinvent                                                       | 0.9       | 1.5                         | 0.8                        | 2.0                     | 7.5                     |
| milk powder                                              | Agribalyse                                                      | 74.8      | 153.1                       | 110.8                      | 113.0                   | 2062.0                  |
| minerals                                                 | Ecoinvent & Agribalyse                                          | 8.7       | 7.1                         | 6.0                        | 81.5                    | 8.2                     |
| wheat middlings                                          | Agribalyse                                                      | 4.6       | 5.0                         | 8.9                        | 16.7                    | 65.9                    |
| (wheat) bran                                             | Agribalyse                                                      | 5.1       | 5.3                         | 9.0                        | 17.0                    | 66.5                    |
| fibre mix                                                | Ecoinvent                                                       | 1.4       | 2.0                         | 3.1                        | 6.3                     | 32.1                    |
| beet pulp, dry                                           | Ecoinvent                                                       | 5.0       | 4.6                         | 10.2                       | 12.4                    | 49.6                    |
| potatoe pulp                                             | Ecoinvent & Agribalyse                                          | 6.1       | 4.9                         | 5.8                        | 17.9                    | 52.8                    |
| animal fat                                               | Ecoinvent & Agri-footprint                                      | 13.1      | 7.0                         | 1.1                        | 3.6                     | 5.7                     |
| (old) bread                                              | Agri-footprint                                                  | 4.3       | 5.5                         | 6.0                        | 42.7                    | 60.5                    |
| whole / maize corn silage                                | Ecoinvent                                                       | 0.4       | 0.5                         | 1.0                        | 1.8                     | 12.6                    |
| Corn cob mix CCM                                         | Ecoinvent                                                       | 2.9       | 3.5                         | 3.7                        | 13.9                    | 26.4                    |
| alfalfa-hay meal/pellets                                 | Ecoinvent                                                       | 29.7      | 8.1                         | 4.4                        | 22.1                    | 192.6                   |
| soybean/rapeseed oil                                     | Agribalyse                                                      | 22.9      | 41.2                        | 20.1                       | 53.3                    | 226.0                   |
| other feed                                               | [average of Ecoinvent, Agribalyse and Agri-footprint data sets] | 5.0       | 5.0                         | 5.4                        | 17.0                    | 61.7                    |

BMNS = body mass net sold. FED = fossil energy depletion; GWP = global warming potential; AP = acidification potential; FEP = fresh water eutrophication potential; MEP = marine eutrophication potential. MJ = megajoule; CO<sub>2</sub>-eq = carbon dioxide equivalents; SO<sub>2</sub>-eq = sulphur dioxide equivalents; P-eq = phosphorous equivalents; N-eq = nitrogen equivalents.

**Supplementary Material Table S5.** Impact factors of bought-in compound feed.

| Unit per kg BMNS                              |                                                                                             | FED | GWP                     | AP                      | FEP                     | MEP                     |
|-----------------------------------------------|---------------------------------------------------------------------------------------------|-----|-------------------------|-------------------------|-------------------------|-------------------------|
|                                               |                                                                                             | MJ  | CO <sub>2</sub> -eq.    | SO <sub>2</sub> -eq.    | P-eq.                   | N-eq.                   |
| <b>Compound feed</b>                          |                                                                                             |     | <b>*10<sup>-1</sup></b> | <b>*10<sup>-3</sup></b> | <b>*10<sup>-5</sup></b> | <b>*10<sup>-4</sup></b> |
| Piglet feed CONVENTIONAL                      | Calculated mixtures of feedstuffs using Ecoinvent, Agri-balyse and Agri-footprint data sets | 5.3 | 7.2                     | 5.2                     | 22.2                    | 51.1                    |
| Piglet feed REGIONAL                          |                                                                                             | 4.5 | 5.5                     | 5.6                     | 25.3                    | 54.9                    |
| Piglet feed ORGANIC                           |                                                                                             | 1.9 | 4.4                     | 11.8                    | 13.6                    | 157.8                   |
| Growing pig / lactating sow feed CONVENTIONAL |                                                                                             | 5.2 | 7.2                     | 5.2                     | 20.9                    | 57.2                    |
| Growing pig / lactating sow feed REGIONAL     |                                                                                             | 4.5 | 5.4                     | 5.5                     | 22.5                    | 60.4                    |
| Growing pig / lactating sow feed ORGANIC      |                                                                                             | 1.6 | 3.2                     | 9.7                     | 10.9                    | 132.5                   |
| Finishing feed CONVENTIONAL                   |                                                                                             | 5.1 | 6.8                     | 5.3                     | 21.2                    | 57.7                    |
| Finishing feed REGIONAL                       |                                                                                             | 4.5 | 5.4                     | 5.5                     | 23.3                    | 60.6                    |
| Finishing feed ORGANIC                        |                                                                                             | 2.2 | 3.2                     | 11.7                    | 17.7                    | 167.8                   |
| Gestating/empty sow feed CONVENTIONAL         |                                                                                             | 4.5 | 5.4                     | 5.4                     | 20.5                    | 89.2                    |
| Gestating/empty sow feed REGIONAL             |                                                                                             | 4.5 | 5.4                     | 5.4                     | 20.5                    | 89.2                    |
| Gestating/empty sow feed ORGANIC              |                                                                                             | 2.4 | 3.5                     | 12.8                    | 15.4                    | 184.6                   |
| Protein mix CON: 30% CP, 12.5 MJ ME           |                                                                                             | 8.5 | 16.8                    | 3.9                     | 18.6                    | 55.7                    |
| Protein mix REGIO: 30% CP, 12.5 MJ ME         |                                                                                             | 4.0 | 6.4                     | 6.0                     | 37.1                    | 78.0                    |
| Protein mix ORGANIC: 30% CP, 12.5 MJ ME       |                                                                                             | 2.1 | 2.9                     | 6.6                     | 33.3                    | 124.0                   |

BMNS = body mass net sold. FED = fossil energy depletion; GWP = global warming potential; AP = acidification potential; FEP = fresh water eutrophication potential; MEP = marine eutrophication potential. MJ = megajoule; CO<sub>2</sub>-eq = carbon dioxide equivalents; SO<sub>2</sub>-eq = sulphur dioxide equivalents; P-eq = phosphorous equivalents; N-eq = nitrogen equivalents.

**Supplementary Material Table S6.** Characteristics of the agricultural fields managed by the pig farmers.

|                                                     | Breeding Farms |           |     | Breeding-to-Finishing Farms |           |     | Finishing Farms |           |     |
|-----------------------------------------------------|----------------|-----------|-----|-----------------------------|-----------|-----|-----------------|-----------|-----|
|                                                     | Q25            | M         | Q75 | Q25                         | M         | Q75 | Q25             | M         | Q75 |
| <b>Total number of farms</b>                        |                | <b>13</b> |     |                             | <b>27</b> |     |                 | <b>23</b> |     |
| <b>Farms with agricultural land<sup>1</sup> (n)</b> |                | 9         |     |                             | 26        |     |                 | 21        |     |
| Area (ha)                                           | 35             | 80        | 120 | 51                          | 86        | 170 | 28              | 53        | 88  |
| <b>Farms with arable land (n)</b>                   |                | 9         |     |                             | 24        |     |                 | 21        |     |
| Area (ha)                                           | 35             | 80        | 119 | 51                          | 84        | 142 | 28              | 44        | 82  |
| <b>Farms growing own pig feed (n)</b>               | 4              |           |     |                             | 21        |     |                 | 12        |     |
| Area (ha)                                           | 32             | 52        | 88  | 30                          | 50        | 100 | 29              | 45        | 71  |

<sup>1</sup>including arable land and grass land. n = number; Q25 = lower quartile, M = median, Q75 = upper quartile.

**Supplementary Material Table S7.** Scaled Key-Performance-Indicators.

Values of KPI to assess biodiversity. Values are between 0 (worst/lowest) and 100 (highest/best value).

|                                                                                                            | Breeding Farms |     |     | Breeding-to-Finishing Farms |     |     | Finishing Farms |     |     |
|------------------------------------------------------------------------------------------------------------|----------------|-----|-----|-----------------------------|-----|-----|-----------------|-----|-----|
| n farms                                                                                                    | 9              |     |     | 26                          |     |     | 21              |     |     |
|                                                                                                            | Q25            | M   | Q75 | Q25                         | M   | Q75 | Q25             | M   | Q75 |
| Cultivating and harvesting crops on riparian strips                                                        | 0              | 100 | 100 | 0                           | 100 | 100 | 100             | 100 | 100 |
| Access of animals to surface water bodies and/or riparian strips                                           | 100            | 100 | 100 | 100                         | 100 | 100 | 100             | 100 | 100 |
| On-farm cultivation of GMO crops                                                                           | 100            | 100 | 100 | 0                           | 100 | 100 | 0               | 100 | 100 |
| Feeding GMO crops                                                                                          | 0              | 100 | 100 | 0                           | 0   | 100 | 0               | 0   | 100 |
| High precision application of nitrogen (N) fertiliser                                                      | 0              | 0   | 0   | 0                           | 0   | 100 | 0               | 0   | 100 |
| Amounts of nitrogen (N) fertiliser abased on demand on soil- or plant analyses                             | 0              | 100 | 100 | 0                           | 100 | 100 | 0               | 100 | 100 |
| P- and K-fertilisers amounts based on the results of soil or plant analysis                                | 100            | 100 | 100 | 50                          | 100 | 100 | 100             | 100 | 100 |
| Proportion of agricultural land with chemical synthetic pesticides                                         | 15             | 70  | 100 | 0                           | 0   | 100 | 0               | 20  | 100 |
| Average pesticide treatment frequency                                                                      | 50             | 50  | 50  | 50                          | 50  | 50  | 50              | 50  | 50  |
| Calculation of humus balances for farmland                                                                 | 0              | 0   | 0   | 0                           | 0   | 0   | 0               | 0   | 0   |
| Arable land with leguminous crops or leguminous grassland                                                  | 0              | 10  | 40  | 0                           | 0   | 2   | 0               | 7   | 26  |
| Conversion of substantial proportion of permanent grassland or pasture to arable land in the past 20 years | 0              | 100 | 100 | 90                          | 100 | 100 | 100             | 100 | 100 |
| Cultivating catch crops                                                                                    | 0              | 5   | 25  | 4                           | 25  | 40  | 0               | 13  | 33  |
| Ecological focus areas                                                                                     | 0              | 0   | 13  | 0                           | 0   | 8   | 0               | 0   | 8   |
| Agricultural land on drained moorland                                                                      | 100            | 100 | 100 | 100                         | 100 | 100 | 100             | 100 | 100 |
| Growing rare or endangered agricultural crops                                                              | 0              | 0   | 0   | 0                           | 0   | 0   | 0               | 0   | 0   |
| Woodland on farm                                                                                           | 3              | 43  | 95  | 0                           | 17  | 63  | 0               | 9   | 43  |
| Woodland deforested and converted to grassland, arable land or buildings in the past 20 years              | 100            | 100 | 100 | 100                         | 100 | 100 | 100             | 100 | 100 |

n = number; M = median, Q25 = lower quartile; Q75 = upper quartile.

**Supplementary Material Table S8.** Spearman correlations ( $r_s$ ) between environmental impacts calculated using LCA (rows) and the biodiversity theme and its three sub-themes (ecosystem, species and genetic diversity; columns) for breeding units and finishing units of crop-livestock farms. No correlation was significant ( $p < 0.05$ ).

|                                      |                        | Sub-Theme           |                   |                   | Theme        |
|--------------------------------------|------------------------|---------------------|-------------------|-------------------|--------------|
|                                      |                        | Ecosystem diversity | Species diversity | Genetic diversity | Biodiversity |
| <b>Breeding units (n)</b>            |                        | 35                  | 35                | 35                | 35           |
| Fossil energy depletion              | MJ                     | -0.23               | -0.17             | -0.04             | -0.10        |
| Global warming potential             | kg CO <sub>2</sub> -eq | -0.21               | -0.12             | -0.02             | -0.07        |
| Acidification potential              | g SO <sub>2</sub> -eq  | 0.08                | 0.11              | 0.24              | 0.18         |
| Fresh water eutrophication potential | g P-eq                 | -0.10               | -0.01             | 0.10              | 0.05         |
| Marine eutrophication potential      | g N-eq                 | 0.12                | 0.16              | 0.36              | 0.32         |
| <b>Finishing units (n)</b>           |                        | 47                  | 47                | 47                | 47           |
| Fossil energy depletion              | MJ                     | 0.10                | 0.12              | 0.20              | 0.17         |
| Global warming potential             | kg CO <sub>2</sub> -eq | 0.15                | 0.16              | 0.23              | 0.19         |
| Acidification potential              | g SO <sub>2</sub> -eq  | 0.04                | 0.06              | 0.21              | 0.13         |
| Fresh water eutrophication potential | g P-eq                 | 0.17                | 0.19              | 0.22              | 0.22         |
| Marine eutrophication potential      | g N-eq                 | 0.19                | 0.16              | 0.27              | 0.23         |

n = number;  $r_s$  = spearman rank correlation coefficient.
